# Supplementary material for: Dynamic porous metal–organic frameworks: synthesis, structure and sorption property
Source: Royal Society of Chemistry journal article supplement (doi:10.1039/c2ce26533h), 2012-01-01
Supplement: c2ce26533h.pdf [file c2ce26533h.pdf]

## *Electronic supplementary information (ESI)*

### **Dynamic porous metal-organic frameworks: synthesis, structure and sorption property**

**Chao Hou,<sup>a</sup> Qing Liu,<sup>a</sup> Taka-aki Okamura,<sup>b</sup> Peng Wang,<sup>a</sup> and Wei-Yin Sun\*<sup>a</sup>**

<sup>a</sup> *Coordination Chemistry Institute, State Key Laboratory of Coordination Chemistry, School of Chemistry and Chemical Engineering, Nanjing National Laboratory of Microstructures, Nanjing University, Nanjing 210093, China E-mail: sunwy@nju.edu.cn; Fax: +86 25 83314502*

<sup>b</sup> *Department of Macromolecular Science, Graduate School of Science, Osaka University, Toyonaka, Osaka 560-0043, Japan*

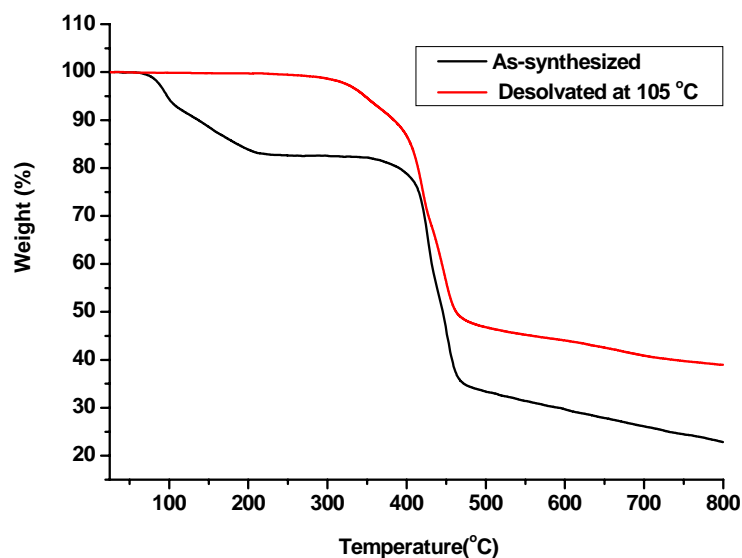

(a)

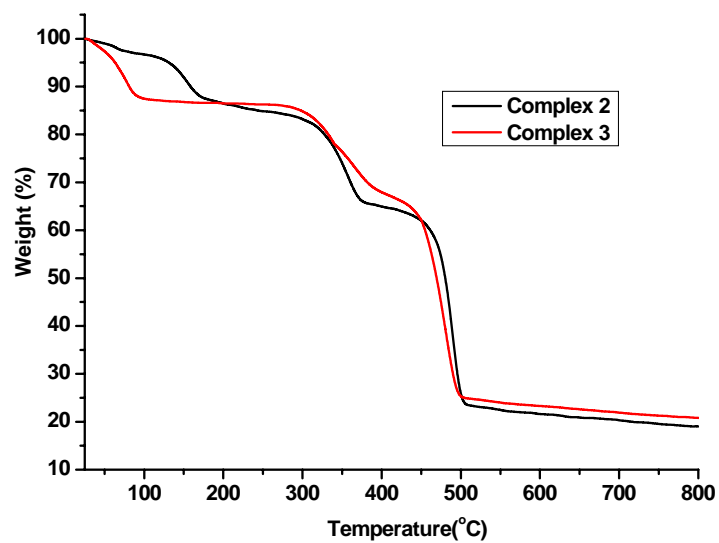

(b)

**Figure S1.** TGA curves for complex 1 (a), complexes 2 and 3 (b).

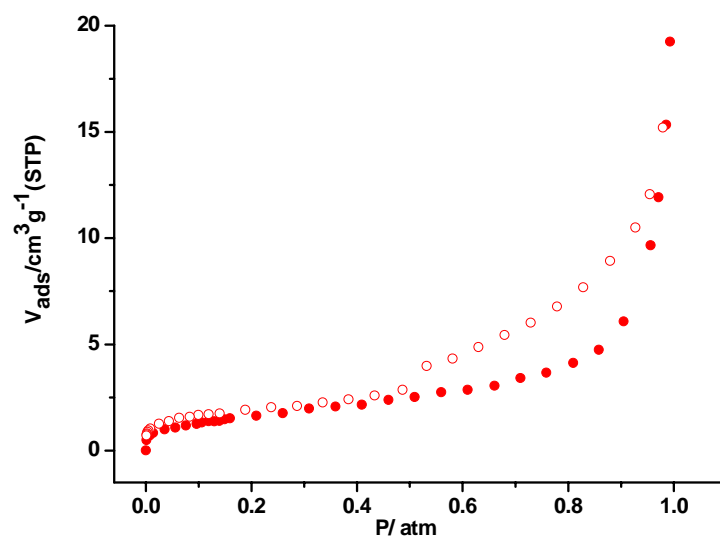

**Figure S2.**  $N_2$  adsorption isotherms for desolvated **1** at 77 K: filled shape, adsorption; open shape, desorption.

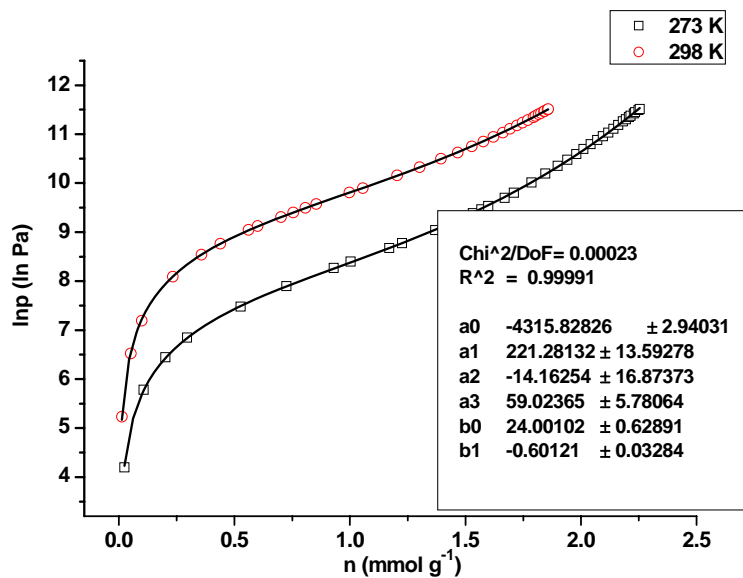

(a)

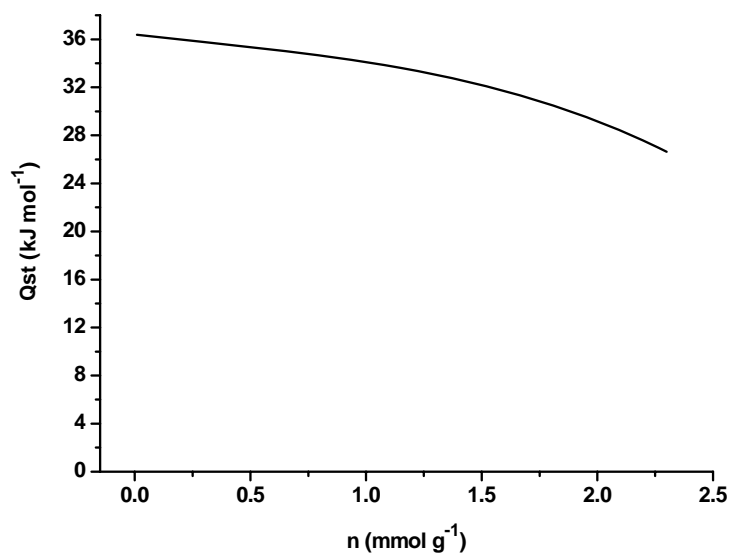

(b)

**Figure S3.** (a) The calculated virial equation isotherms parameters fit to the experimental CO<sub>2</sub> data of desolvated **1**. (b) The isosteric adsorption enthalpy for desolvated **1**.

### Estimation of the isosteric heats of gas adsorption

A virial-type [1] expression comprising the temperature-independent parameters  $a_i$  and  $b_j$  was employed to calculate the enthalpies of adsorption for CO<sub>2</sub> (at 273 and 298 K) on desolvated **1**. In each case, the data were fitted using the equation:

$$\ln P = \ln N + 1/T \sum_{i=0}^m a_i N^i + \sum_{j=0}^n b_j N^j$$

Here,  $P$  is the pressure expressed in Pa,  $N$  is the amount adsorbed in mmol g<sup>-1</sup>,  $T$  is the temperature in K,  $a_i$  and  $b_j$  are virial coefficients, and  $m$ ,  $n$  represent the number of coefficients required to adequately describe the isotherms ( $m$  and  $n$  were gradually increased until the contribution of extra added  $a$  and  $b$  coefficients was deemed to be statistically insignificant towards the overall fit, and the average value of the squared deviations from the experimental values was minimized). The values of the virial coefficients  $a_0$  through  $a_m$  were then used to calculate the isosteric heat of adsorption using the following expression.

$$Q_{st} = -R \sum_{i=0}^m a_i N^i$$

$Q_{st}$  is the coverage-dependent isosteric heat of adsorption and  $R$  is the universal gas constant.

[1] Rowsell, J. L. C.; Yaghi, O. M. *J. Am. Chem. Soc.* **2006**, *128*, 1304.

## Indexing result of the powder pattern of the desolvated solid of 1

\*\*\* CONVENTIONAL CELL (METRIC SYMMETRY) \*\*\*

MONOCLINIC P

a = 19.902(24), b = 6.412(8), c = 12.645(10) Å

$\alpha = 90.00$ ,  $\beta = 118.12(5)$ ,  $\gamma = 90.00$  °; V = 1423.30 Å<sup>3</sup>

| H  | K | L | SST-OBS  | SST-CALC | DELTA     | 2TH-OBS | 2TH-CALC | D-OBS   |
|----|---|---|----------|----------|-----------|---------|----------|---------|
| -1 | 0 | 1 | 0.003836 | 0.003839 | -0.000003 | 7.102   | 7.105    | 12.4365 |
| -2 | 0 | 1 | 0.006753 | 0.006760 | -0.000007 | 9.427   | 9.432    | 9.3737  |
| 2  | 0 | 0 | 0.007744 | 0.007703 | 0.000042  | 10.097  | 10.070   | 8.7530  |
| 0  | 1 | 0 | 0.014375 | 0.014431 | -0.000056 | 13.772  | 13.799   | 6.4246  |
| -1 | 0 | 2 |          | 0.015292 |           |         | 14.207   |         |
| -2 | 0 | 2 | 0.015345 | 0.015356 | -0.000011 | 14.232  | 14.237   | 6.2182  |
| 0  | 0 | 2 |          | 0.019079 |           |         | 15.879   |         |
| 0  | 1 | 1 | 0.019214 | 0.019200 | 0.000014  | 15.935  | 15.930   | 5.5570  |
| -3 | 0 | 2 |          | 0.019272 |           |         | 15.959   |         |
| -2 | 1 | 1 | 0.021253 | 0.021190 | 0.000063  | 16.765  | 16.740   | 5.2837  |
| 1  | 1 | 1 |          | 0.023982 |           |         | 17.818   |         |
| -4 | 0 | 1 | 0.024153 | 0.024155 | -0.000001 | 17.882  | 17.882   | 4.9563  |
| -4 | 0 | 2 | 0.027011 | 0.027038 | -0.000028 | 18.919  | 18.929   | 4.6869  |
| -3 | 0 | 3 | 0.034561 | 0.034552 | 0.000010  | 21.428  | 21.425   | 4.1434  |
| 2  | 1 | 2 | 0.052631 | 0.052638 | -0.000007 | 26.525  | 26.527   | 3.3576  |
| -5 | 1 | 1 | 0.052862 | 0.053059 | -0.000197 | 26.585  | 26.635   | 3.3502  |
| -5 | 1 | 2 |          | 0.053087 |           |         | 26.642   |         |
| -2 | 0 | 4 |          | 0.061169 |           |         | 28.638   |         |
| -4 | 0 | 4 | 0.061379 | 0.061425 | -0.000046 | 28.689  | 28.700   | 3.1091  |
| 4  | 1 | 1 |          | 0.061436 |           |         | 28.702   |         |
| -1 | 2 | 1 |          | 0.061561 |           |         | 28.732   |         |

NUMBER OF OBS. LINES = 13

NUMBER OF CALC. LINES = 21

M(13) = 13 AVEPS = 0.0000372

F 13 = 16.(0.013383, 62)

M CF. J.APPL.CRYST. 1(1968)108

F CF. J.APPL.CRYST. 12(1979)60

0 LINES ARE UNINDEXED

M-TEST= 13 UNINDEXED IN THE TEST= 0
